# Supplementary material for: Hierarchical cobalt–nitride and –oxide co-doped porous carbon nanostructures for highly efficient and durable bifunctional oxygen reaction electrocatalysts
Source: Royal Society of Chemistry journal article supplement (doi:10.1039/c7nr06646e), 2017-01-01
Supplement: c7nr06646e1.pdf [file c7nr06646e1.pdf]

## Supplementary material for

### **Hierarchical cobalt-nitride and -oxide co-doped porous carbon nanostructures for highly efficient and durable bifunctional oxygen reaction electrocatalysts**

*Kyung Jin Lee<sup>a,b</sup>, Dong Yun Shin<sup>c</sup>, Ayeong Byeon<sup>a</sup>, Ahyoun Lim<sup>a,d</sup>, Young Suk Jo<sup>a</sup>, Alina Begley<sup>e</sup>, Dong-Hee Lim<sup>c</sup>, Yung-Eun Sung<sup>d</sup>, Hyun S. Park<sup>a</sup>, Keun Hwa Chae<sup>f</sup>, Suk Woo Nam<sup>a,b</sup>, Kwan-Young Lee<sup>b</sup>, and Jin Young Kim<sup>a,b\*</sup>*

*<sup>a</sup>Fuel Cell Research Center, Korea Institute of Science and Technology, Hwarangno 14-gil 5, Seongbuk-gu, Seoul 02792, Republic of Korea, <sup>b</sup>Green School, Korea University, 145, Anam-ro, Seongbuk-gu, Seoul 02841, Republic of Korea, <sup>c</sup>Department of Environmental Engineering, Chungbuk National University, Chungdae-ro 1, Seowon-gu, Cheongju, Chungbuk 28644, Republic of Korea, <sup>d</sup>School of Chemical and Biological Engineering, Seoul National University, Seoul 08826, Republic of Korea, <sup>e</sup>Faculty of Chemistry and Mineralogy, University of Leipzig, Johannisallee 29, 04109 Leipzig, Germany, <sup>f</sup>Advanced Analysis Center, Korea Institute of Science and Technology (KIST), Seoul 02792, Republic of Korea*

\*Corresponding author: jinykim@kist.re.kr

This document includes Supplementary figures (Figure S1-S15) and tables (Table S1-S3).

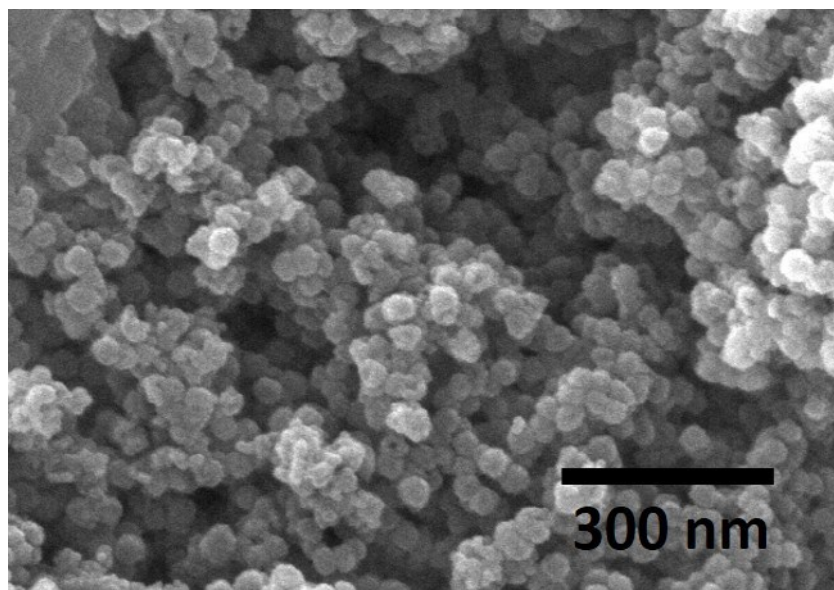

**Figure S1.** SEM image of hollow N-doped carbon microspheres.

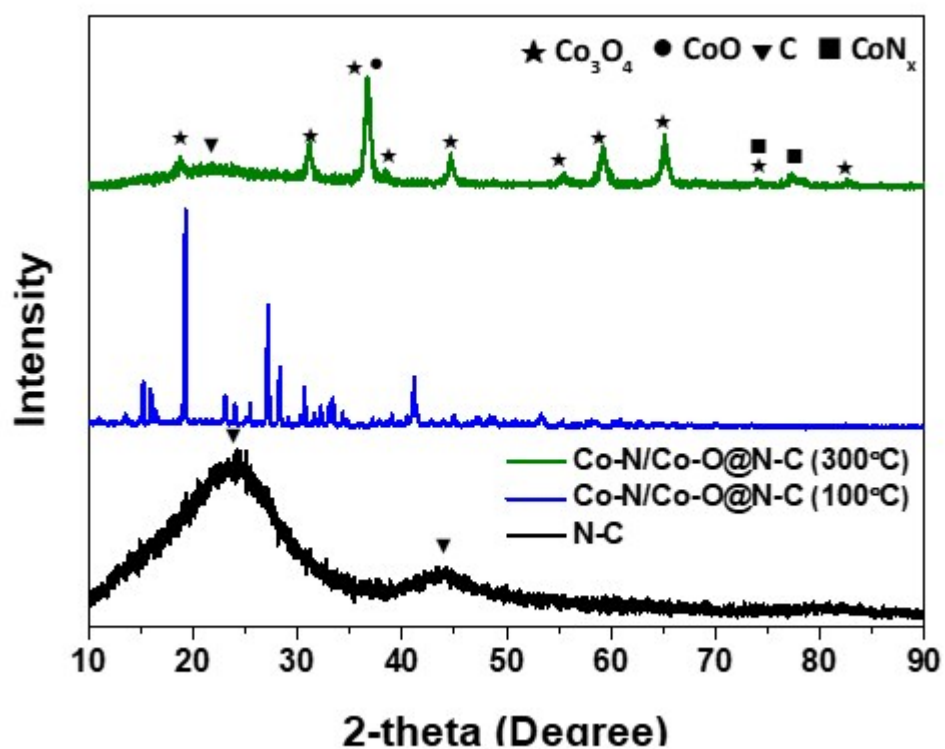

**Figure S2.** XRD patterns of hollow N-C and Co-N/Co-O@N-C (100°C) and Co-N/Co-O@N-C (300 °C). All peaks of Co-N/Co-O@N-C (100°C) indicated cobalt nitrate hydrate ( $\text{Co}(\text{NO}_3)_2 \cdot 6\text{H}_2\text{O}$ ). (JCPDS#25-1219)

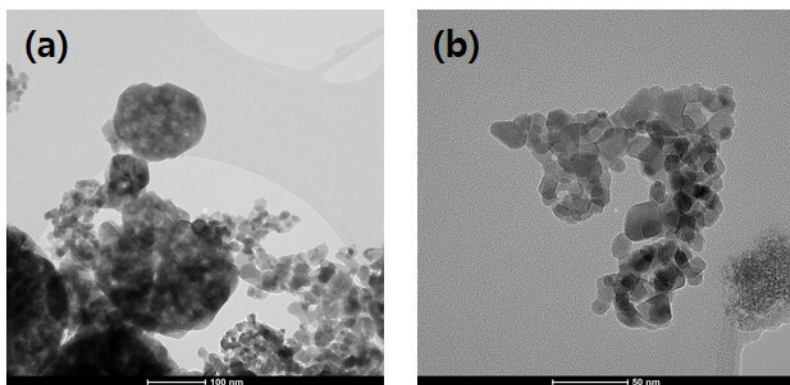

**Figure S3.** TEM images of Co-N/Co-O@N-C samples treated with  $\text{Co}(\text{NO}_3)_2 \cdot 6\text{H}_2\text{O}$  of 5M concentration (a) and annealed at 400°C (b).

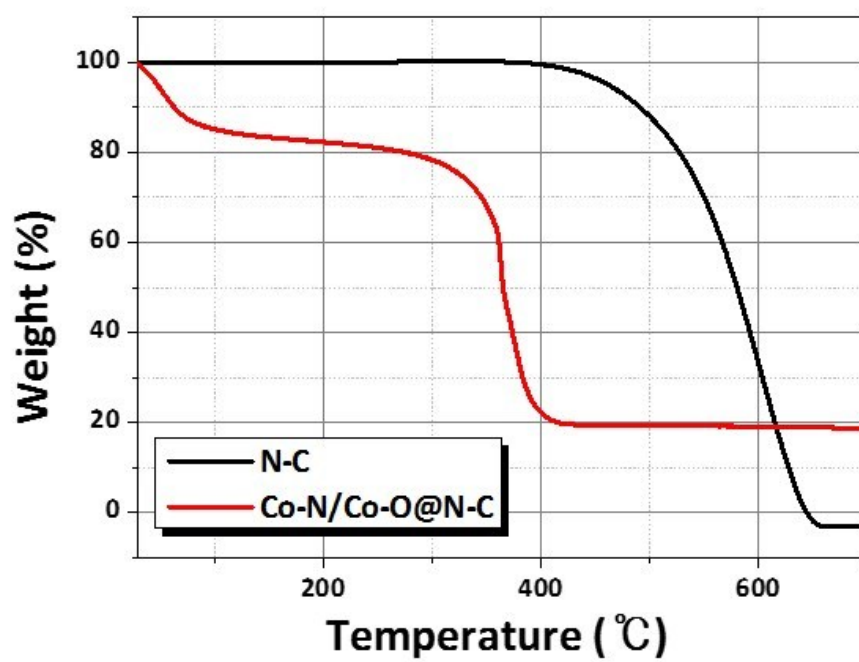

**Figure S4.** TGA profiles of hollow N-C and Co-N/Co-O@N-C samples.

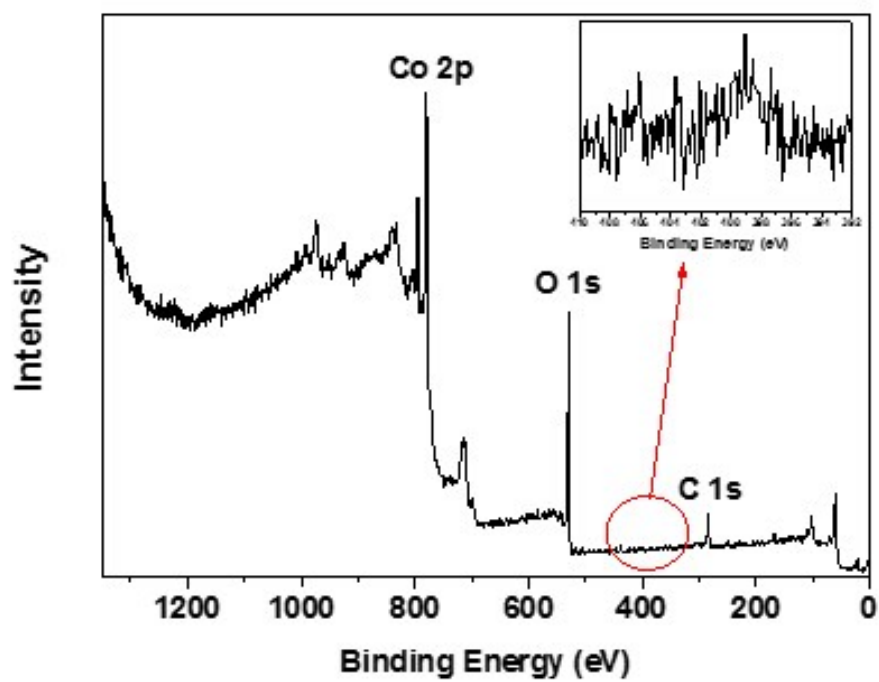

**Figure S5.** XPS survey spectrum of Co-N/Co-O@N-C (400°C) and N1s narrow-scan spectrum in inner box.

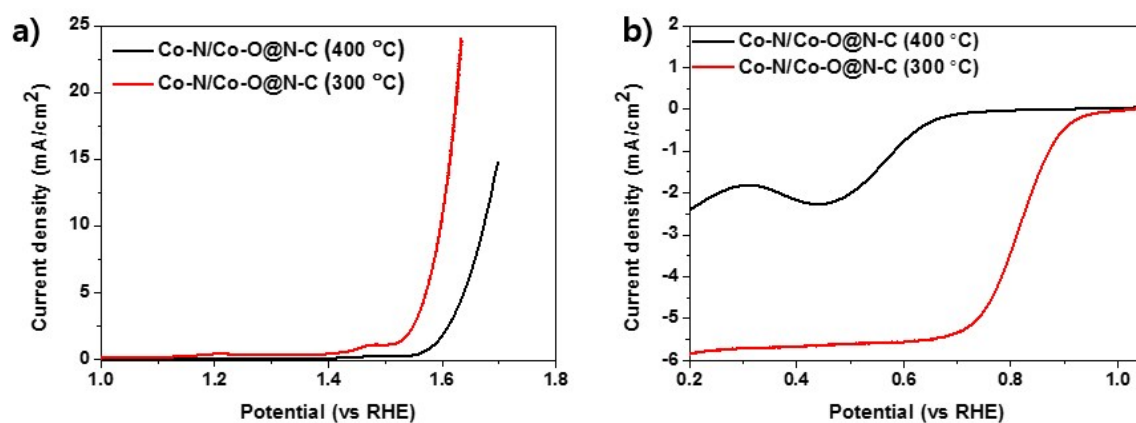

**Figure S6.** Electrochemical measurements of the Co-N/Co-O@N-C samples heat-treated at 300 °C and 400 °C: (a) OER polarization curves and (b) ORR polarization curves.

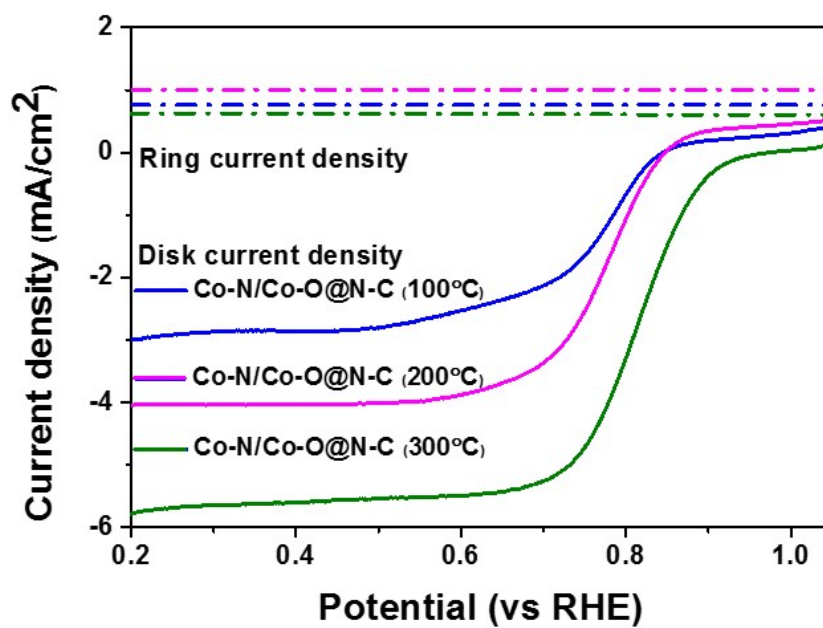

**Figure S7.** RRDE test of the ORR on Co-N/Co-O@N-C according to the annealing temperature in O<sub>2</sub>-saturated 0.1M KOH aqueous solution at 1600 rpm.

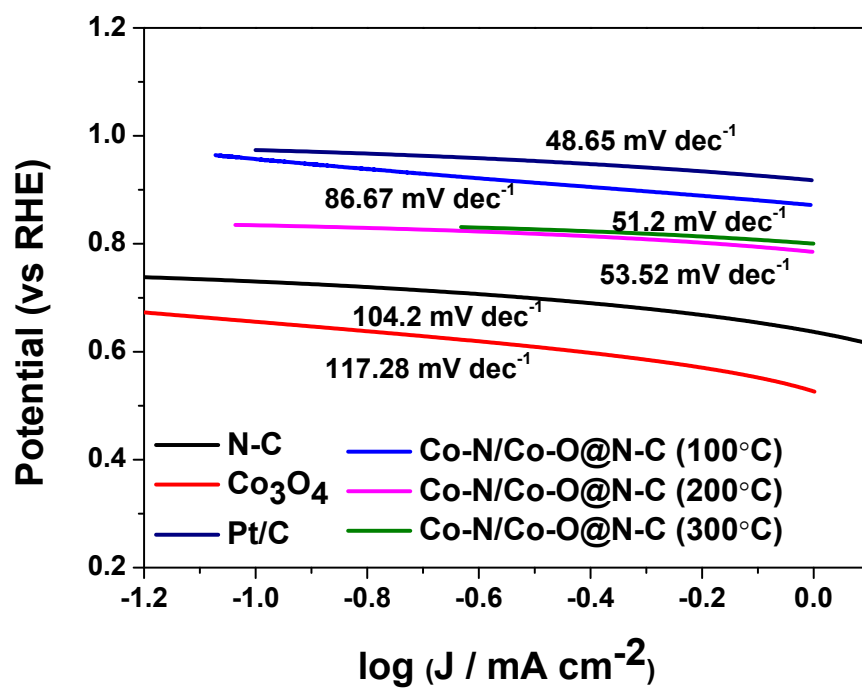

**Figure S8.** ORR Tafel plot.

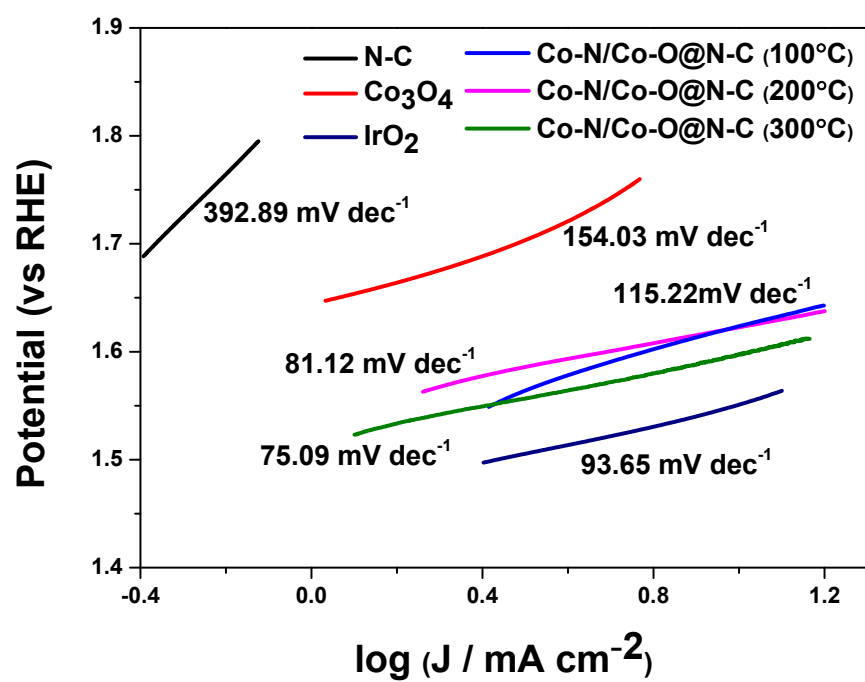

Figure S9. OER Tafel plot.

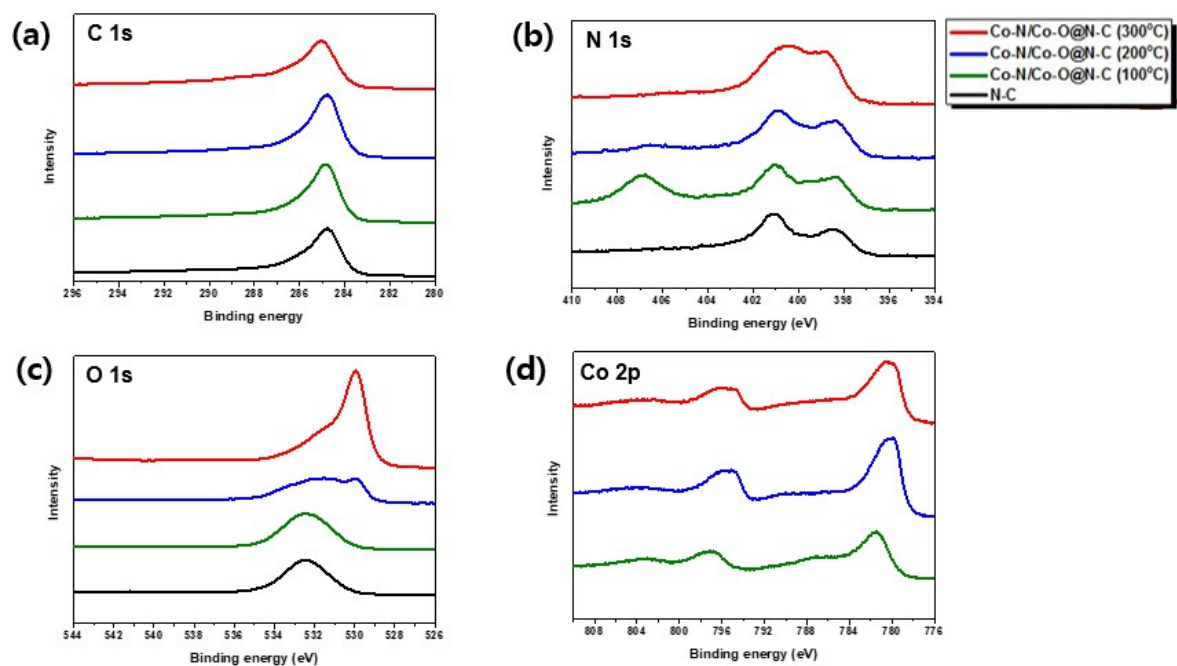

**Figure S10.** XPS spectra of the samples for N-C and Co-N/Co-O@N-C samples annealed at 100, 200 and 300°C: (a) C1s, (b) N1s, (c) O1s and (d) Co2p.

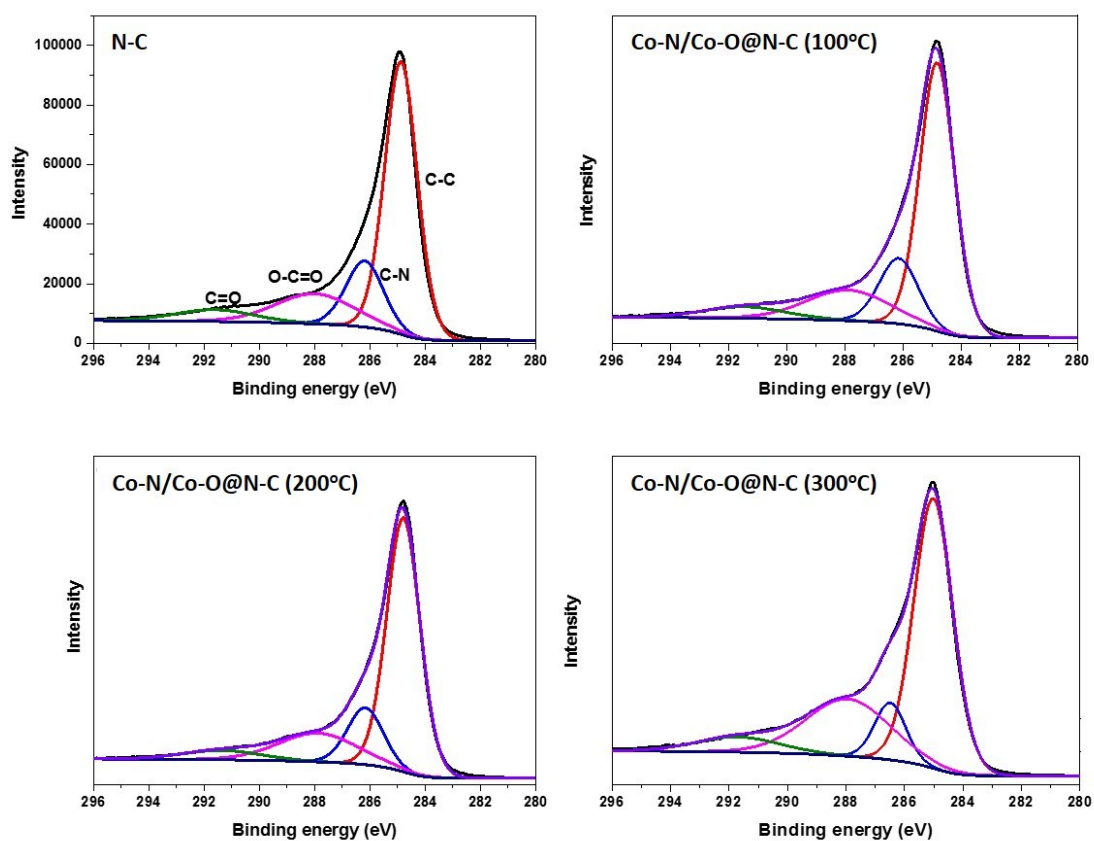

**Figure S11.** Deconvolution of XPS C1s spectra of the samples for N-C and Co-N/Co-O@N-C samples annealed at 100, 200 and 300°C.

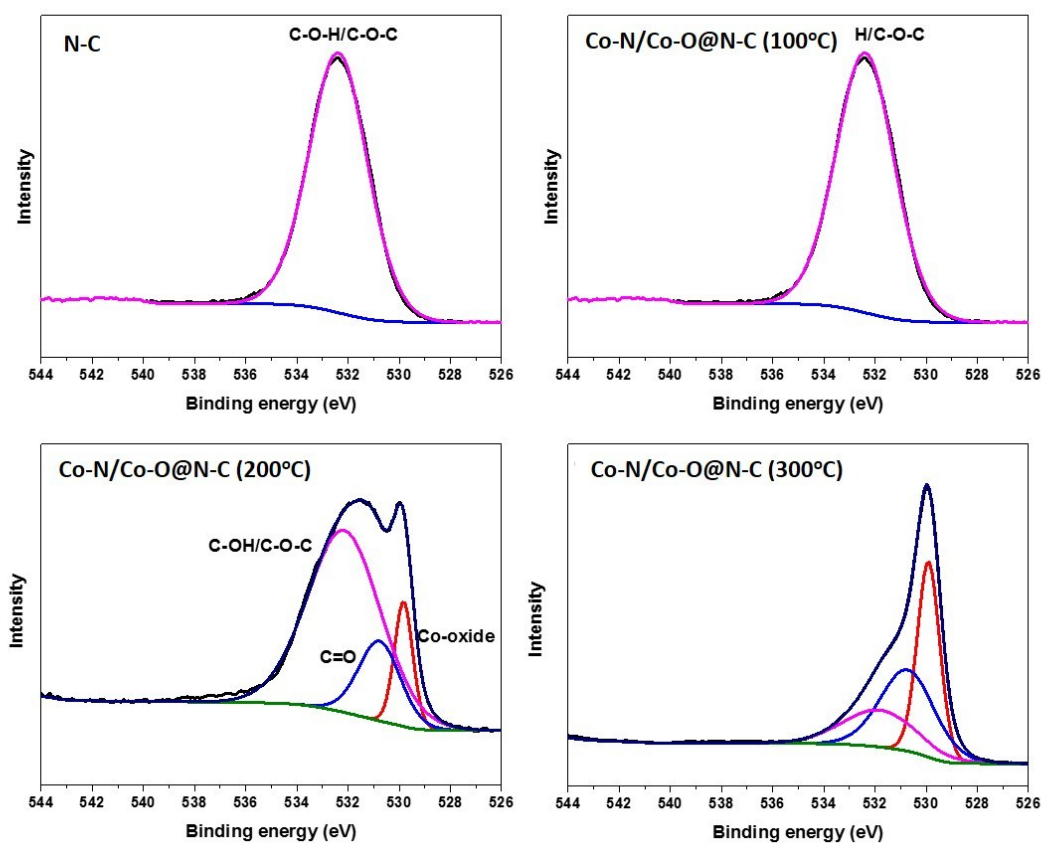

**Figure S12.** Deconvolution of XPS O1s spectra of the samples for N-C and Co-N/Co-O@N-C samples annealed at 100, 200 and 300°C.

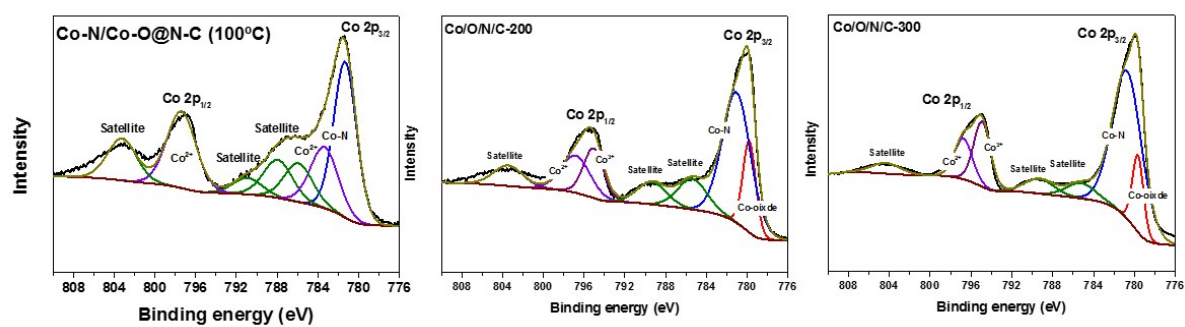

**Figure S13.** Deconvolution of XPS Co<sub>2</sub>p spectra of the samples for Co-N/Co-O@N-C samples annealed at 100, 200 and 300°C.

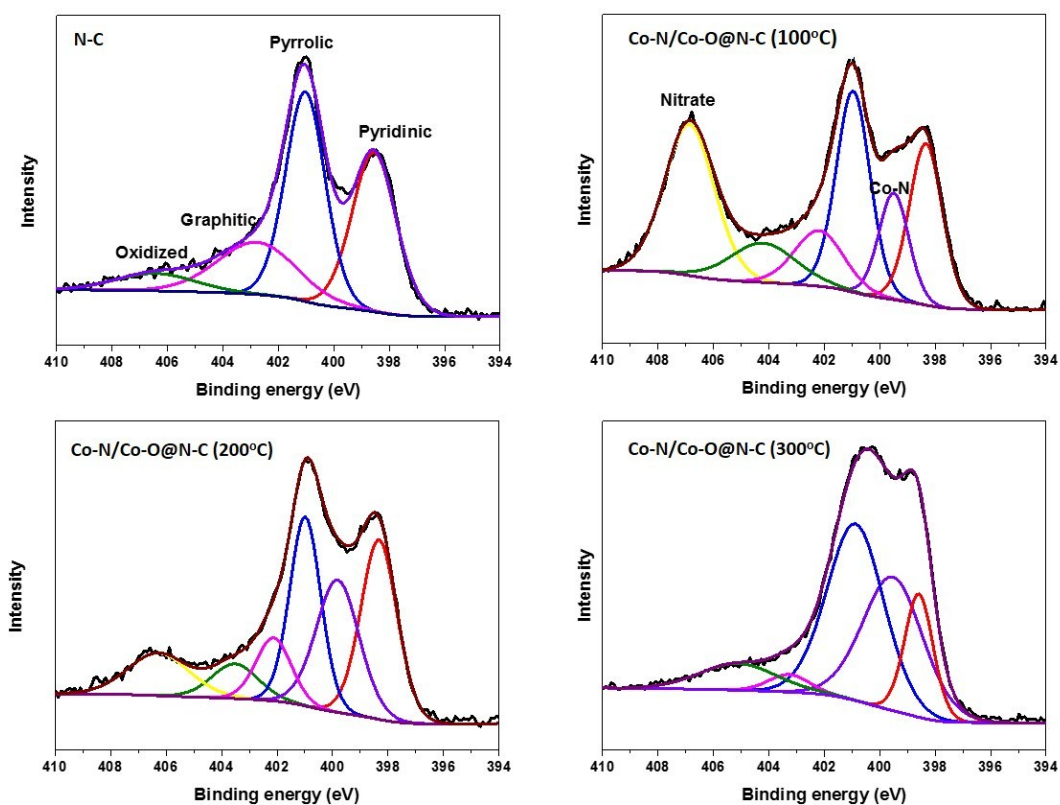

**Figure S14.** Deconvolution of XPS N1s spectra of the samples for N-C and Co-N/Co-O@N-C samples annealed at 100, 200 and 300°C.

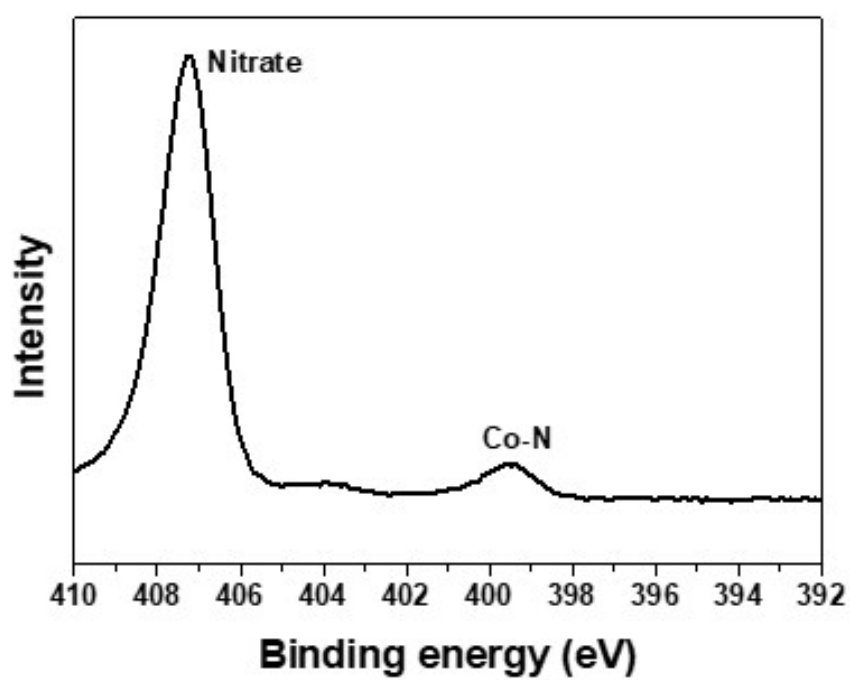

**Figure S15.** N 1s narrow-scan spectrum of Co-N/Co-O@N-C phase prepared via heat-treatment ( $\sim 100^{\circ}\text{C}$ ) of cobalt nitrate with hollow N-doped carbon microsphere.

| Sample        | Specific surface area | Total pore volume        | Average pore size |
|---------------|-----------------------|--------------------------|-------------------|
| N-C           | 846 m <sup>2</sup> /g | 0.306 cm <sup>3</sup> /g | 9.44 nm           |
| Co-N/Co-O@N-C | 493 m <sup>2</sup> /g | 0.186 cm <sup>3</sup> /g | 8.23 nm           |

**Table S1.** Specific surface area, total pore volume, average pore size from N<sub>2</sub> adsorption-desorption isotherms of hollow N-C and Co-N/Co-O@N-C samples.

| Sample                   | Specific surface area   | Total pore volume        | Average pore size |
|--------------------------|-------------------------|--------------------------|-------------------|
| Co-N/Co-O@N-C<br>(400°C) | 25.34 m <sup>2</sup> /g | 0.119 cm <sup>3</sup> /g | 18.9 nm           |

**Table S2.** Specific surface area, total pore volume, average pore size from N<sub>2</sub> adsorption-desorption isotherms of Co-N/Co-O@N-C (400°C) sample.

| Co(K)-N               | Coordination number |
|-----------------------|---------------------|
| Co-N/Co-O@N-C (100°C) | 0.452               |
| Co-N/Co-O@N-C (200°C) | 1.198               |
| Co-N/Co-O@N-C (300°C) | 1.155               |

**Table S3.** Coordination numbers of cobalt attached to nitrogen in Co-N/Co-O@N-C complexes.
